# Supplementary material
Source: PubMed Central journal article supplement (PMC11262037)

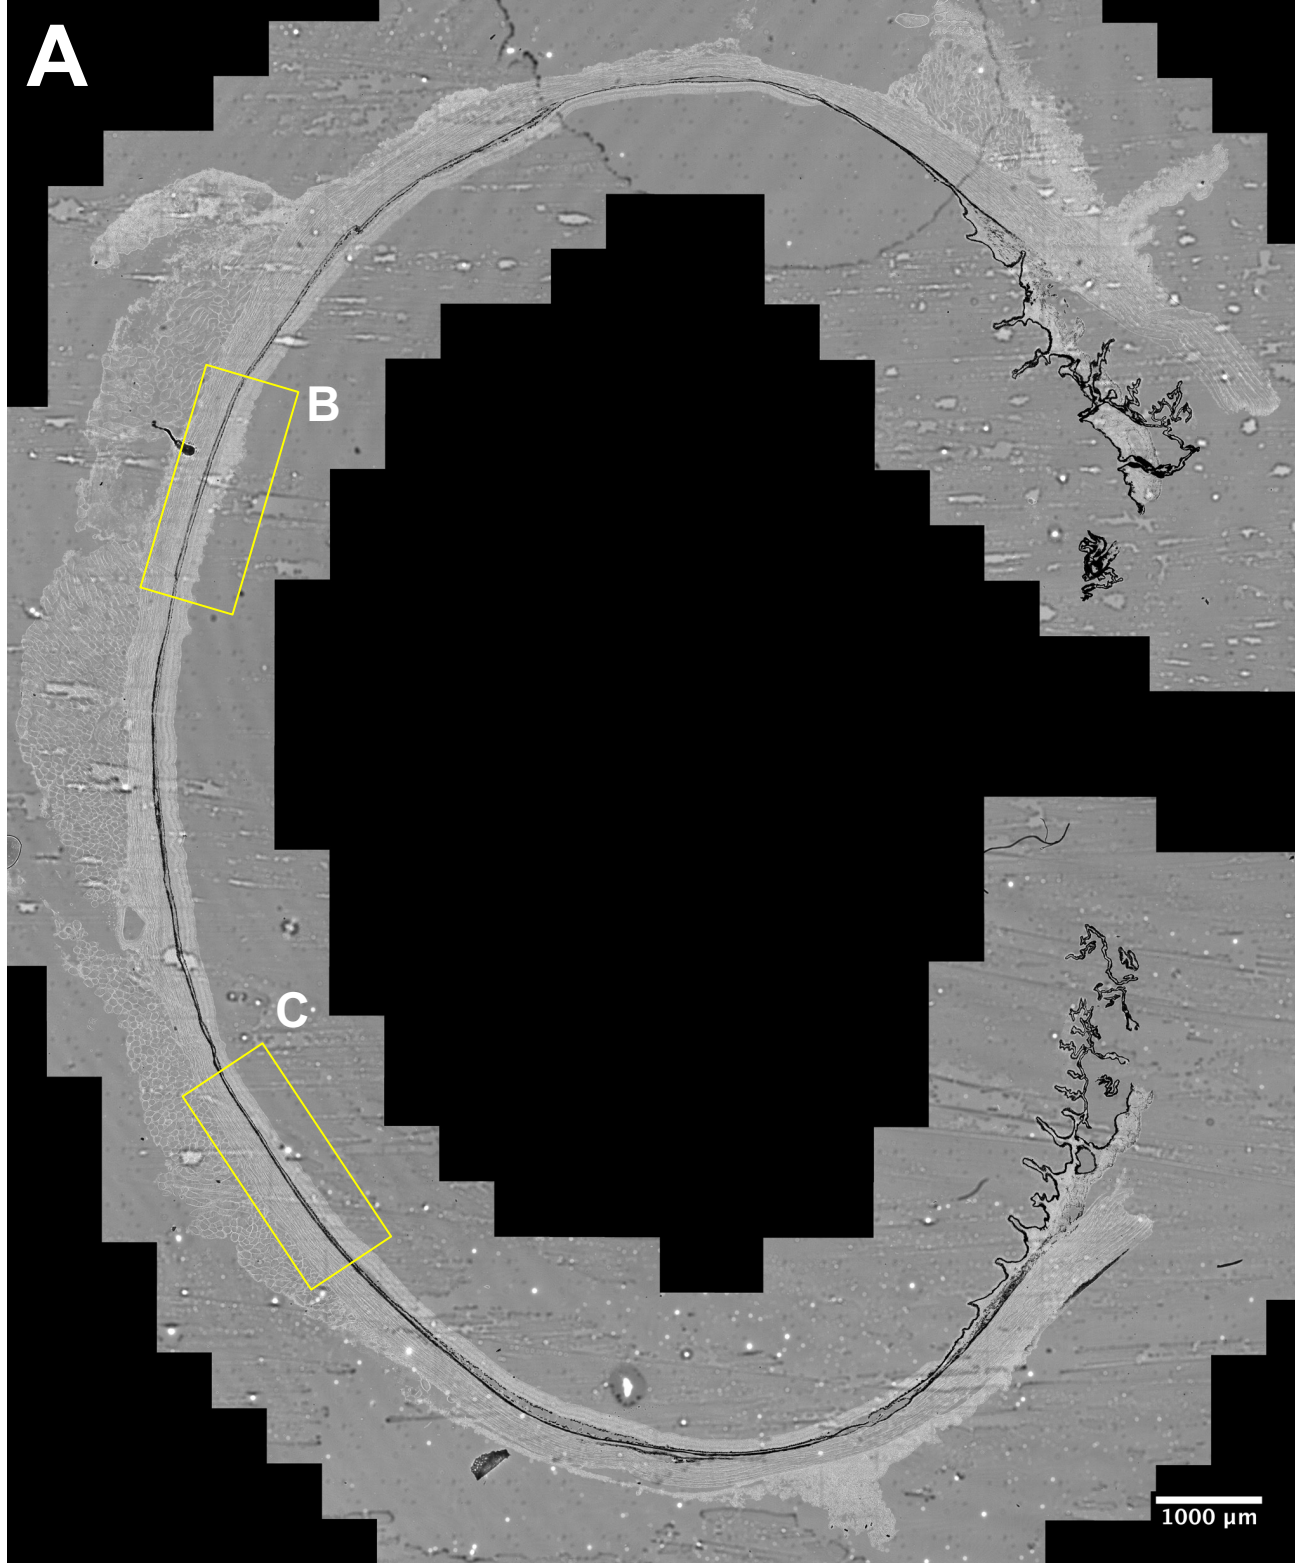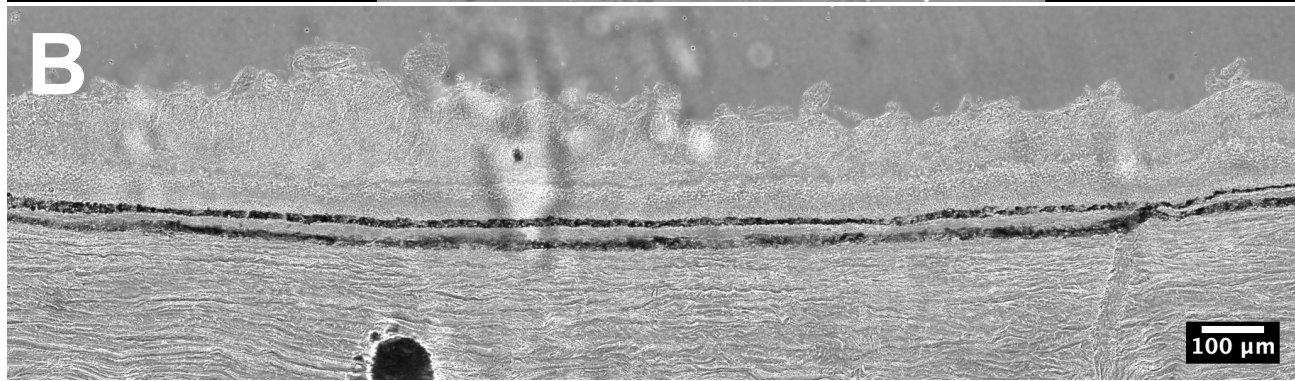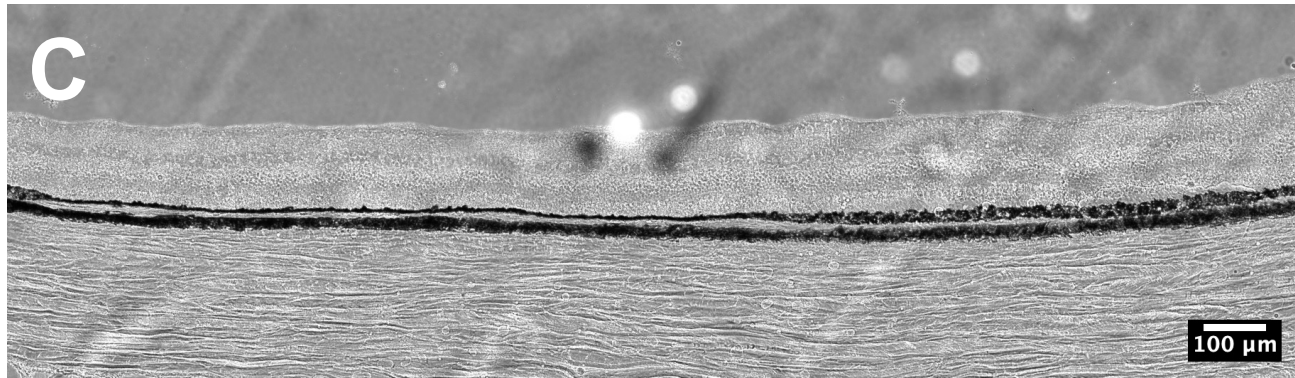

Supplement: NIHMS1999507-supplement-Figure_S1.pdf [file NIHMS1999507-supplement-Figure_S1.pdf]
